# Supplementary material
Source: publisher figshare collection journal article supplement (https://acs.figshare.com/ndownloader/files/7788622)
Supplement: Supplementary file 1 [file 7788622]

## Supporting Information

### **A facile preparation of poly(lactic acid)/brushite bi-layer coating on biodegradable magnesium alloys with multiple functionalities for orthopedic application**

Lei Zhang<sup>†</sup>, Jia Pei<sup>\*,†</sup>, Haodong Wang, Yongjuan Shi, Jialin Niu, Feng Yuan, Hua Huang, Hua Zhang, Guangyin Yuan<sup>\*</sup>

*National Engineering Research Center of Light Alloy Net Forming & State Key Laboratory of Metal Matrix Composite, Shanghai Jiao Tong University, Shanghai, 200240, China*

*\*Corresponding author. E-mail: jpei@sjtu.edu.cn; Tel.: +86 21 34203051; fax: +86 21 3420*

*2794.*

*\* Corresponding author. E-mail: gyyuan@sjtu.edu.cn; Tel.: +86 21 34203051; fax: +86 21 3420 2794.*

<sup>†</sup> Lei Zhang and Jia Pei contribute equally to this work.

## Supplementary information

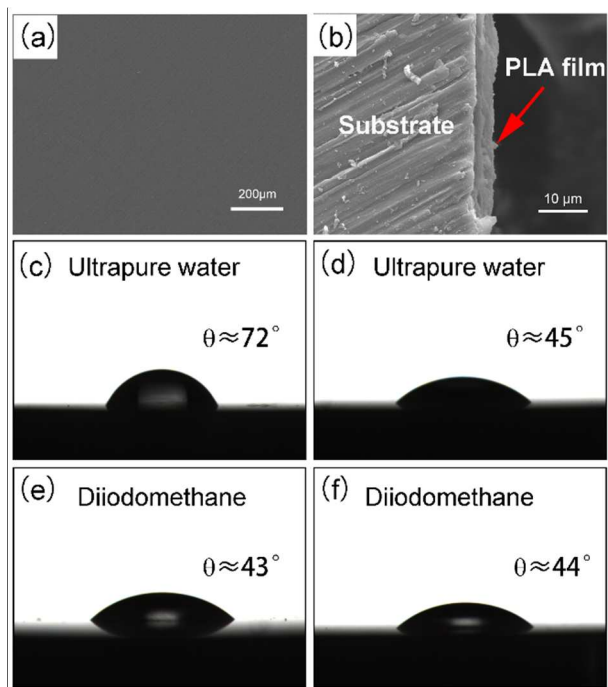

Fig. S1 (a) SEM top view and (b) cross-section view of the PLA film; and static water and diiodomethane contact angle measurements of PLA film (c, e) before and (d, f) after UV irradiation.

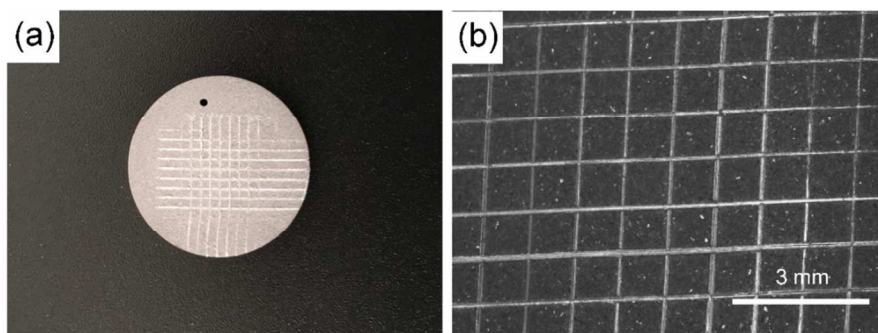

Fig. S2 Macroscopic view (a) and stereoscopic view (b) of the cross-hatch pattern area of DCPD/PLA-Mg sample after ASTM adhesion test.

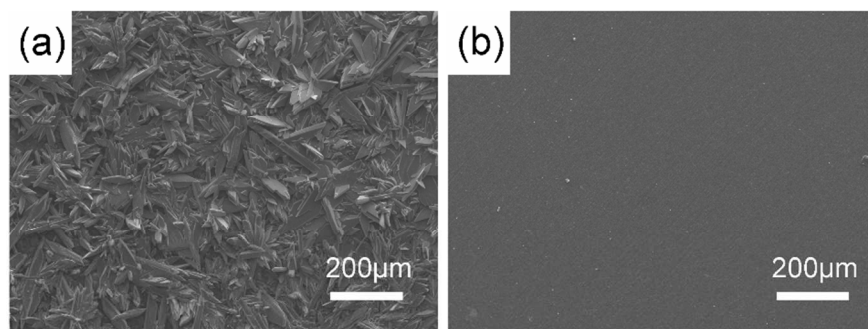

Fig. S3 SEM top-view image of deposited DCPD on PLA film with (a) and without (b) the pretreatment of UV irradiation.

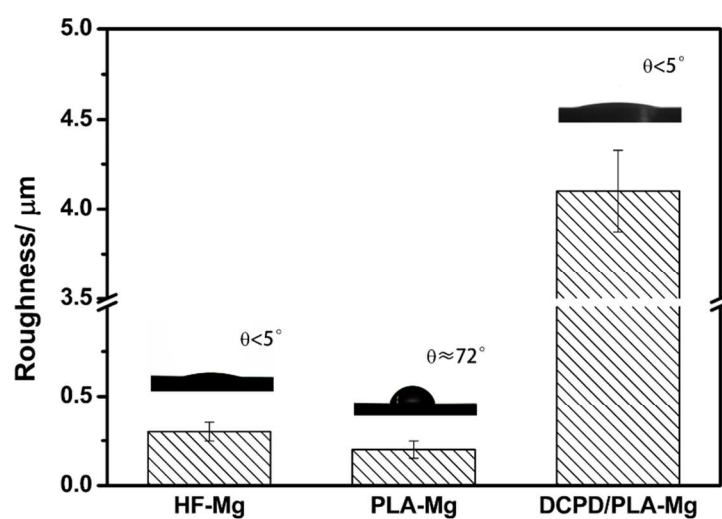

Fig. S4 Surface roughness and water contact angle measurements of HF-Mg, PLA-Mg and DCPD/PLA-Mg samples, respectively.

Table S1

Values of the long-range dispersion  $\gamma^d$  and the short-range polar  $\gamma^p$  components of the surface tension of the two liquids used in the study

| Liquid          | Dispersive component( $\gamma^d$ , mN/m) | Polar component ( $\gamma^p$ , mN/m) |
|-----------------|------------------------------------------|--------------------------------------|
| Ultrapure water | 21.8                                     | 51.0                                 |
| Diiodomethane   | 50.8                                     | 0                                    |
